# Supplementary material
Source: MDPI journal article supplement (https://www.mdpi.com/2077-0472/13/7/1409)

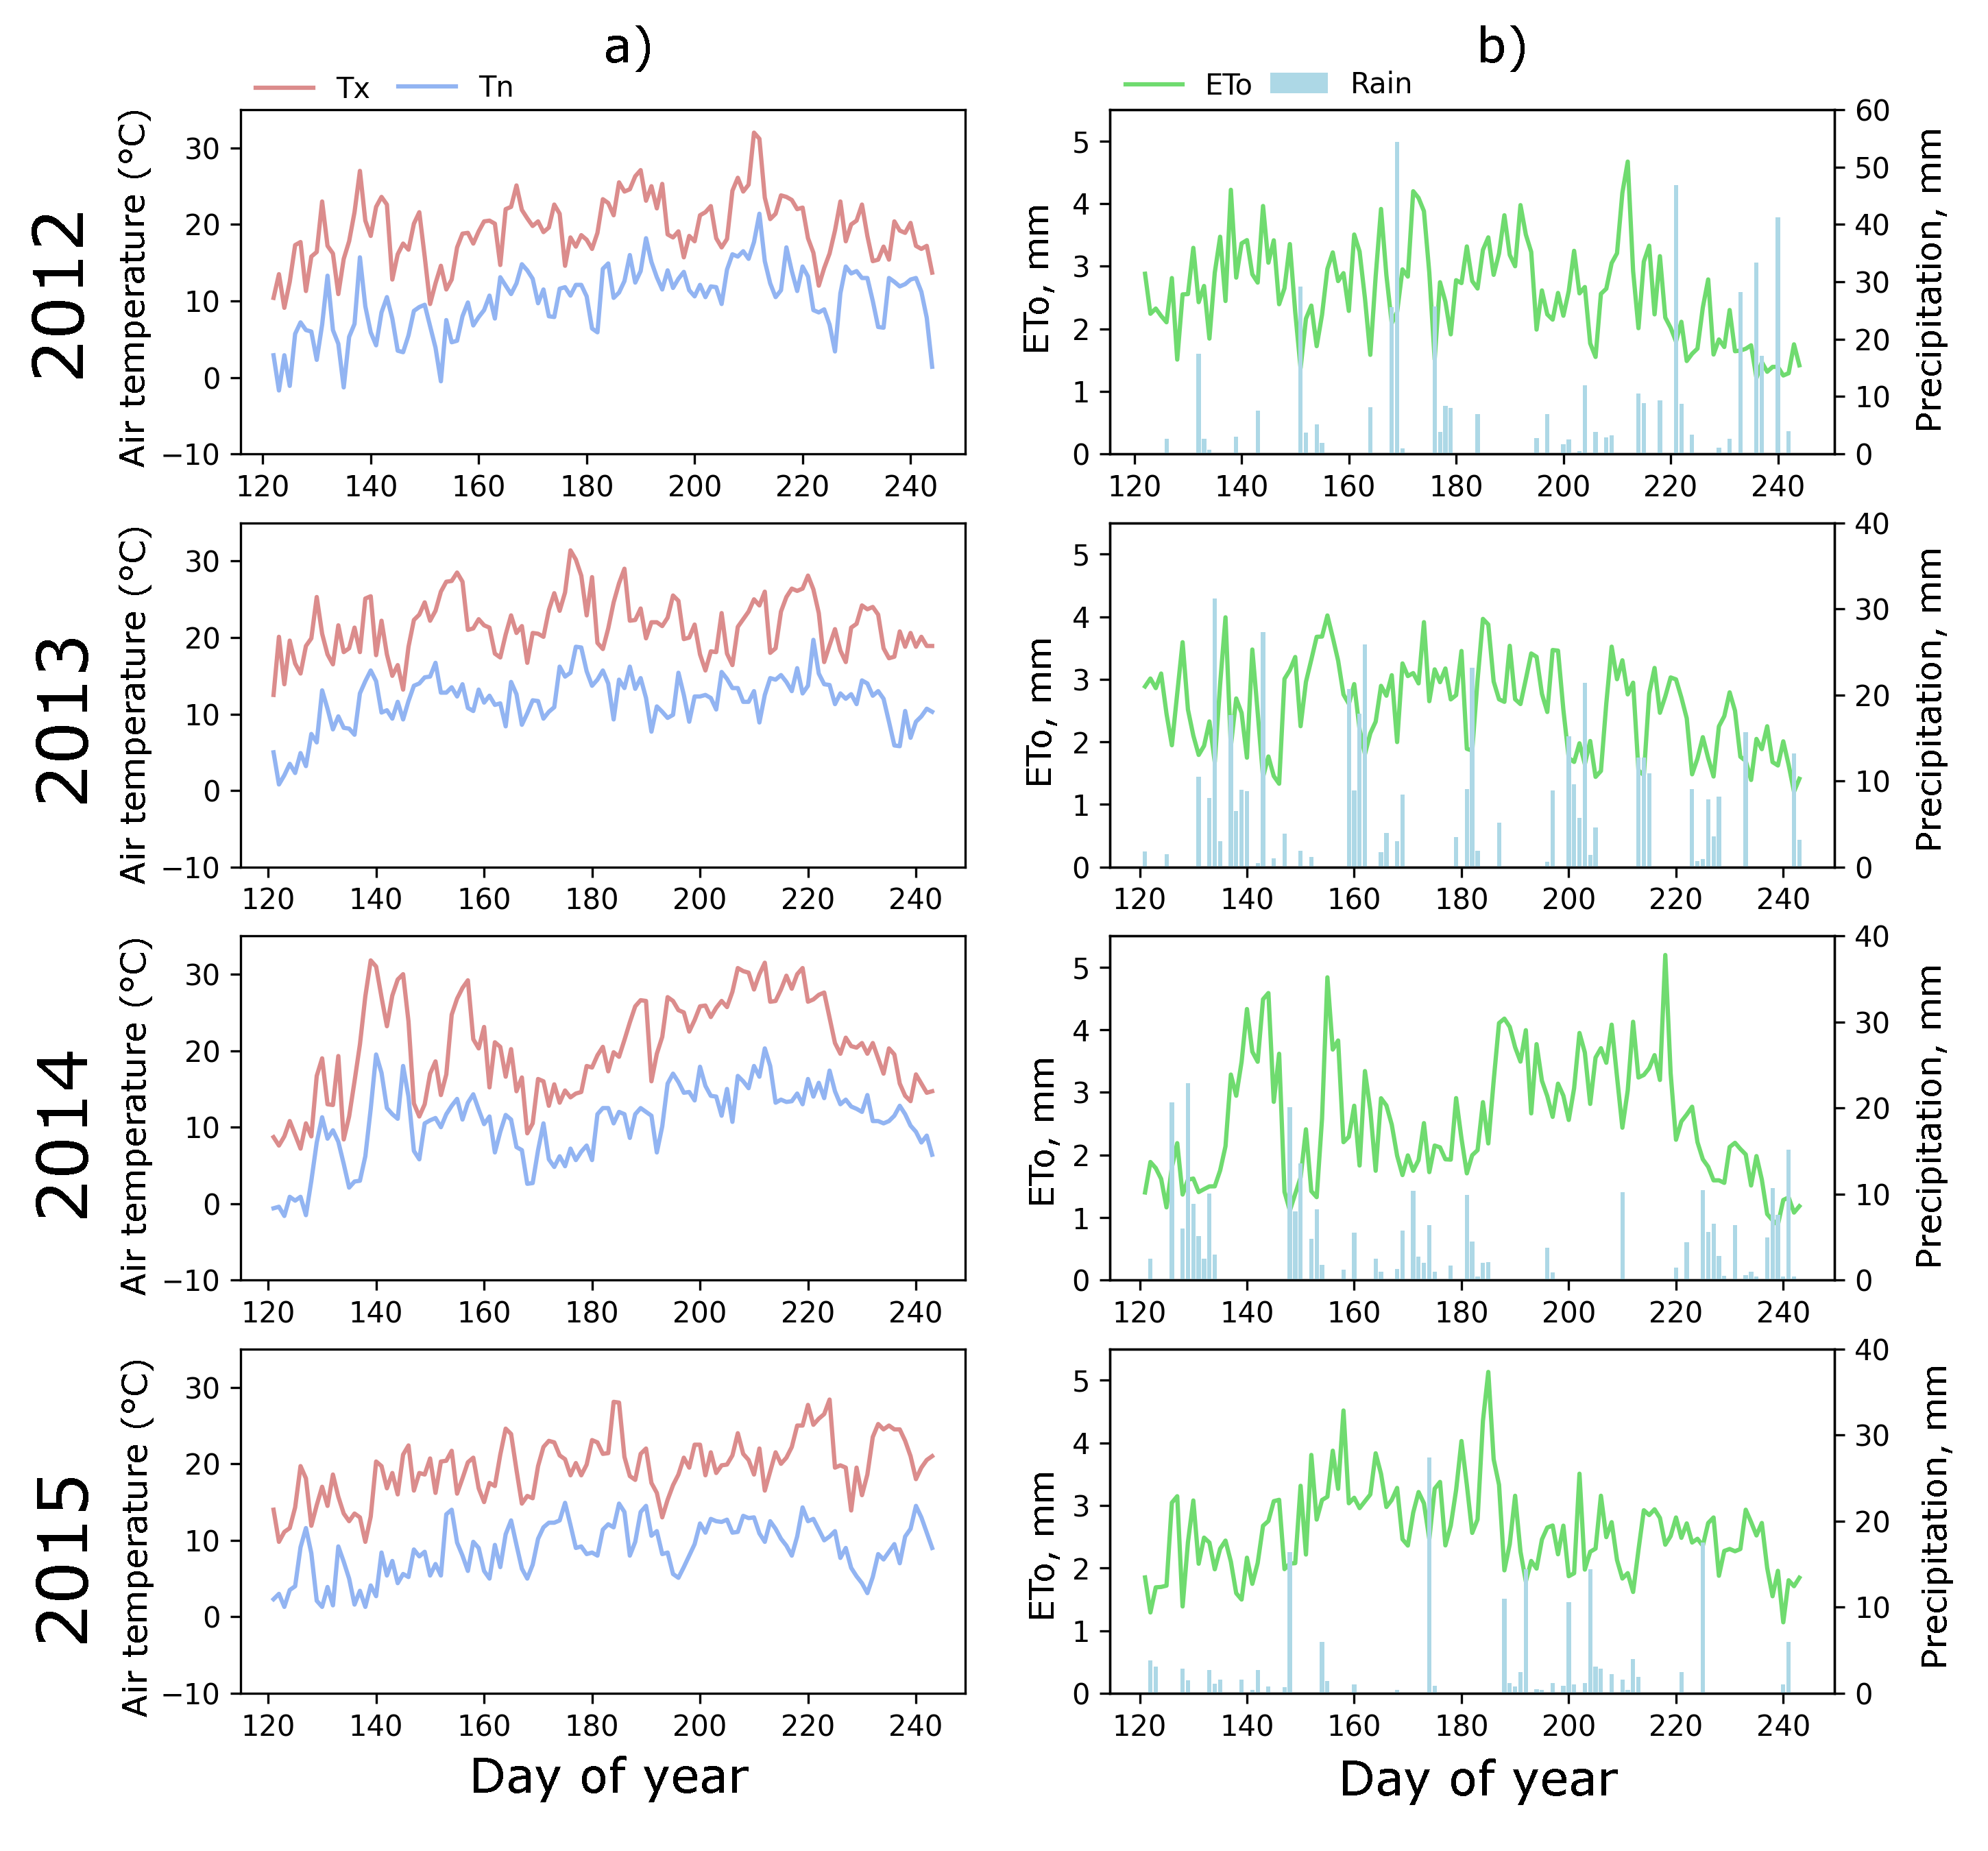

Supplement: s1 [file s1 › Fig S1.png]
